# Supplementary material
Source: Springer Nature journal article supplement (https://www.springermedizin.de/resource/supplementary/12990_2010_333_MOESM4_ESM.pdf/9613054)

**A**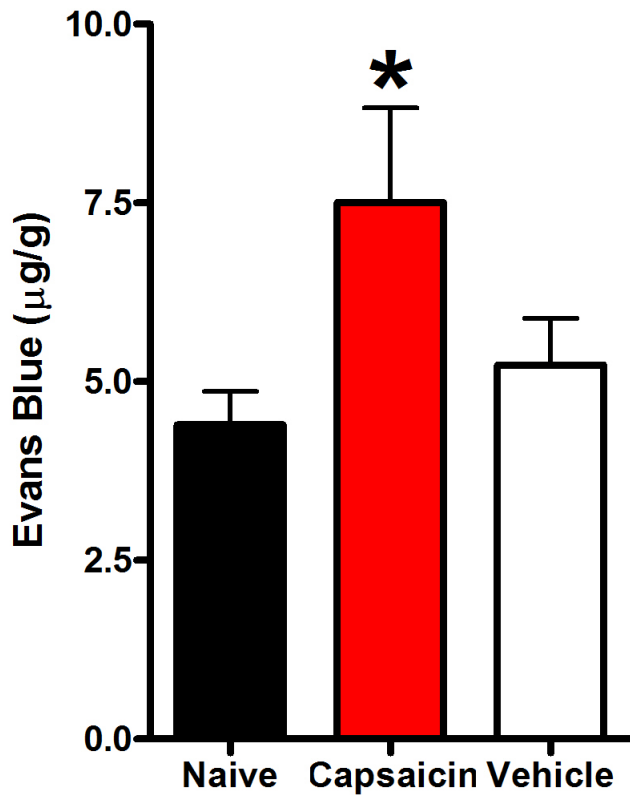

**Dorsal spinal cord  
24 hours  
post-capsaicin**

**B**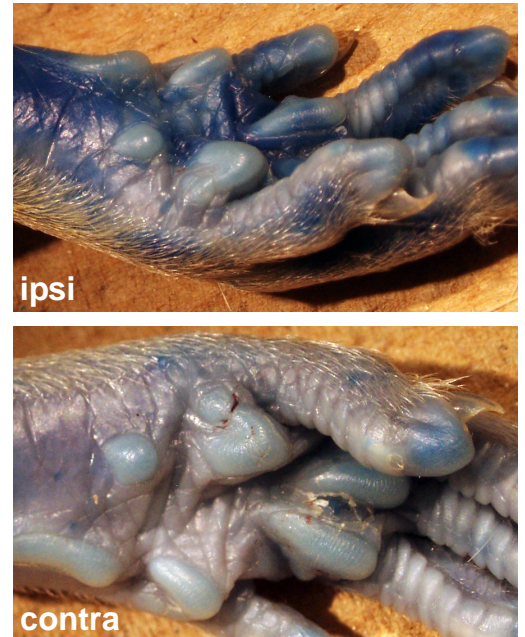

**45 minutes  
post-capsaicin**

Supplement: MOESM4 [file 9613054]
